# Supplementary material for: Making kinetic and thermodynamic enolates via solvent-free high speed ball milling
Source: Royal Society of Chemistry journal article supplement (doi:10.1039/b922108p), 2009-12-08

## Supplemental Information Table of Contents

|                                                                 |              |
|-----------------------------------------------------------------|--------------|
| <b>Experimental</b> .....                                       | <b>S2-S3</b> |
| <b>2-(<i>p</i>-bromobenzyl)-cyclohexanone</b>                   |              |
| <sup>1</sup> HNMR.....                                          | S4           |
| ESI-HRMS.....                                                   | S4           |
| <sup>13</sup> CNMR.....                                         | S5           |
| <b><i>trans</i>-2,6-di-(<i>p</i>-bromobenzyl)-cyclohexanone</b> |              |
| <sup>1</sup> HNMR.....                                          | S6           |
| <sup>13</sup> CNMR.....                                         | S7           |
| <b><i>cis</i>-2,6-di-(<i>p</i>-bromobenzyl)-cyclohexanone</b>   |              |
| <sup>1</sup> HNMR.....                                          | S8           |
| ESI-HRMS.....                                                   | S8           |
| <sup>13</sup> CNMR.....                                         | S9           |
| <b>di-(<i>p</i>-bromobenzyl)-ether</b>                          |              |
| <sup>1</sup> HNMR.....                                          | S10          |
| ESI-HRMS.....                                                   | S10          |
| <sup>13</sup> CNMR.....                                         | S11          |
| <b>di-(<i>p</i>-bromobenzyl)-carbonate</b>                      |              |
| <sup>1</sup> HNMR.....                                          | S12          |
| ESI-HRMS.....                                                   | S12          |
| <sup>13</sup> CNMR.....                                         | S13          |
| <b>2-(<i>p</i>-bromobenzyl)-2-methyl-cyclohexanone</b>          |              |
| <sup>1</sup> HNMR.....                                          | S14          |
| ESI-HRMS.....                                                   | S14          |
| <sup>13</sup> CNMR.....                                         | S15          |
| <b>2-(<i>p</i>-bromobenzyl)-6-methyl-cyclohexanone</b>          |              |
| <sup>1</sup> HNMR.....                                          | S16          |
| ESI-HRMS.....                                                   | S16          |
| <sup>13</sup> CNMR.....                                         | S17          |

## Experimental

All NMR spectra were recorded on a Bruker Avance 400 spectrometer. Deuterated NMR solvents were obtained from Cambridge Isotope Laboratories, Inc., Andover MA, and used without further purification. *p*-Bromobenzyl bromide, cesium fluoride, cyclohexanone, lithium hexamethyldisilazide, lithium hydroxide, 2-methylcyclohexanone, potassium carbonate, potassium hydroxide, sodium hydroxide and sodium hydride were purchased from Acros Organics and used without further purification. 18-crown-6 was purchased from Sigma-Aldrich and used without further purification. Ball milling was carried out in a 8000M SpexCertiprep mixer/mill. Ball bearings were purchased from Small Parts Incorporated. Custom made vials were made by the machine shop at the University of Cincinnati with metal rods purchased from ESPICorp Inc.

## Procedure

**2-(*p*-bromobenzyl)-cyclohexanone with KOH.** Cyclohexanone (0.25 mL, 2.42 mmol), 4-bromobenzyl bromide (603 mg, 2.42 mmol), and potassium hydroxide (135 mg, 2.42 mmol) were added to a custom-made 2" by 1/2" screw capped stainless steel vial along with a 1/8" stainless steel ball bearing. The vial was placed in a 8000M Spex Certiprep mixer/mill and the contents were ball milled for 17 hours. The resulting mixture was dissolved in ethyl acetate (15 mL) and washed with 10% HCl (15 mL). The organic layer was dried over anhydrous MgSO<sub>4</sub> and the solvent was evaporated under reduced pressure. The mixture was separated on a *CombiFlash Companion* from *Teledyne Isco* using a gradient of cyclohexane and methylene chloride. This afforded 2-(*p*-bromobenzyl)-cyclohexanone in a 29% yield.

**2-(*p*-bromobenzyl)-cyclohexanone with LiHMDS.** Cyclohexanone (0.25 mL, 2.42 mmol), 4-bromobenzyl bromide (603 mg, 2.42 mmol), and lithium hexamethyldisilazide (403 mg, 2.42 mmol) were added to a custom-made 2" by 1/2" screw capped stainless steel vial along with a 1/8" stainless steel ball bearing under an argon atmosphere. The vial was placed in a 8000M Spex Certiprep mixer/mill and the contents were ball milled for 17 hours. The resulting mixture was dissolved in ethyl acetate (15 mL) and washed with 10% HCl (15 mL). The organic layer was dried over anhydrous MgSO<sub>4</sub> and the solvent was evaporated under reduced pressure. The mixture was separated on a *CombiFlash Companion* from *Teledyne Isco* using a gradient of cyclohexane and methylene chloride. This afforded 2-(*p*-bromobenzyl)-cyclohexanone in a 64% yield.

**di-(*p*-bromobenzyl)-carbonate.** Cyclohexanone (0.25 mL, 2.42 mmol), 4-bromobenzyl bromide (603 mg, 2.42 mmol), potassium carbonate (331 mg, 2.42 mmol), and 18-crown-6 (673 mg, 2.42 mmol) were added to a custom-made 2" by 1/2" screw capped stainless steel vial along with a 1/8" stainless steel ball bearing. The vial was placed in a 8000M Spex Certiprep mixer/mill and the contents were ball milled for 17 hours. The resulting mixture was dissolved in ethyl acetate (15 mL) and washed with 10% HCl (15 mL). The organic layer was dried over anhydrous MgSO<sub>4</sub> and the solvent was evaporated under reduced pressure. The mixture was separated on a *CombiFlash Companion* from

*Teledyne Isco* using a gradient of cyclohexane and methylene chloride. This afforded di-(*p*-bromobenzyl)-carbonate in a 45% yield.

### **Thermodynamic and Kinetic Products of 2-methyl-cyclohexanone**

**2-(*p*-bromobenzyl)-2-methyl-cyclohexanone.** 2-methyl-cyclohexanone (224 mg, 2.00 mmol), 4-bromobenzyl bromide (500 mg, 2.00 mmol), and sodium hydroxide (80 mg, 2.00 mmol) were added to a custom-made 2" by 1/2" screw capped stainless steel vial along with a 1/8" stainless steel ball bearing. The vial was placed in a 8000M Spex Certiprep mixer/mill and the contents were ball milled for 17 hours. The resulting mixture was dissolved in ethyl acetate (15 mL) and washed with 10% HCl (15 mL). The organic layer was dried over anhydrous MgSO<sub>4</sub> and the solvent was evaporated under reduced pressure. The mixture was separated on a *CombiFlash Companion* from *Teledyne Isco* using a gradient of cyclohexane and methylene chloride. This afforded 2-(*p*-bromobenzyl)-2-methyl-cyclohexanone in a 76% yield.

**2-(*p*-bromobenzyl)-6-methyl-cyclohexanone.** 2-methyl-cyclohexanone (224 mg, 2.00 mmol), 4-bromobenzyl bromide (500 mg, 2.00 mmol), and lithium hexamethyldisilazide (334 mg, 2.00 mmol) were added to a custom-made 2" by 1/2" screw capped stainless steel vial along with a 1/8" stainless steel ball bearing under an argon atmosphere. The vial was placed in a 8000M Spex Certiprep mixer/mill and the contents were ball milled for 17 hours. The resulting mixture was dissolved in ethyl acetate (15 mL) and washed with 10% HCl (15 mL). The organic layer was dried over anhydrous MgSO<sub>4</sub> and the solvent was evaporated under reduced pressure. The mixture was separated on a *CombiFlash Companion* from *Teledyne Isco* using a gradient of cyclohexane and methylene chloride. This afforded 2-(*p*-bromobenzyl)-2-methyl-cyclohexanone in a 45% yield.

## 2-(*p*-bromobenzyl)-cyclohexanone

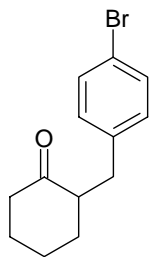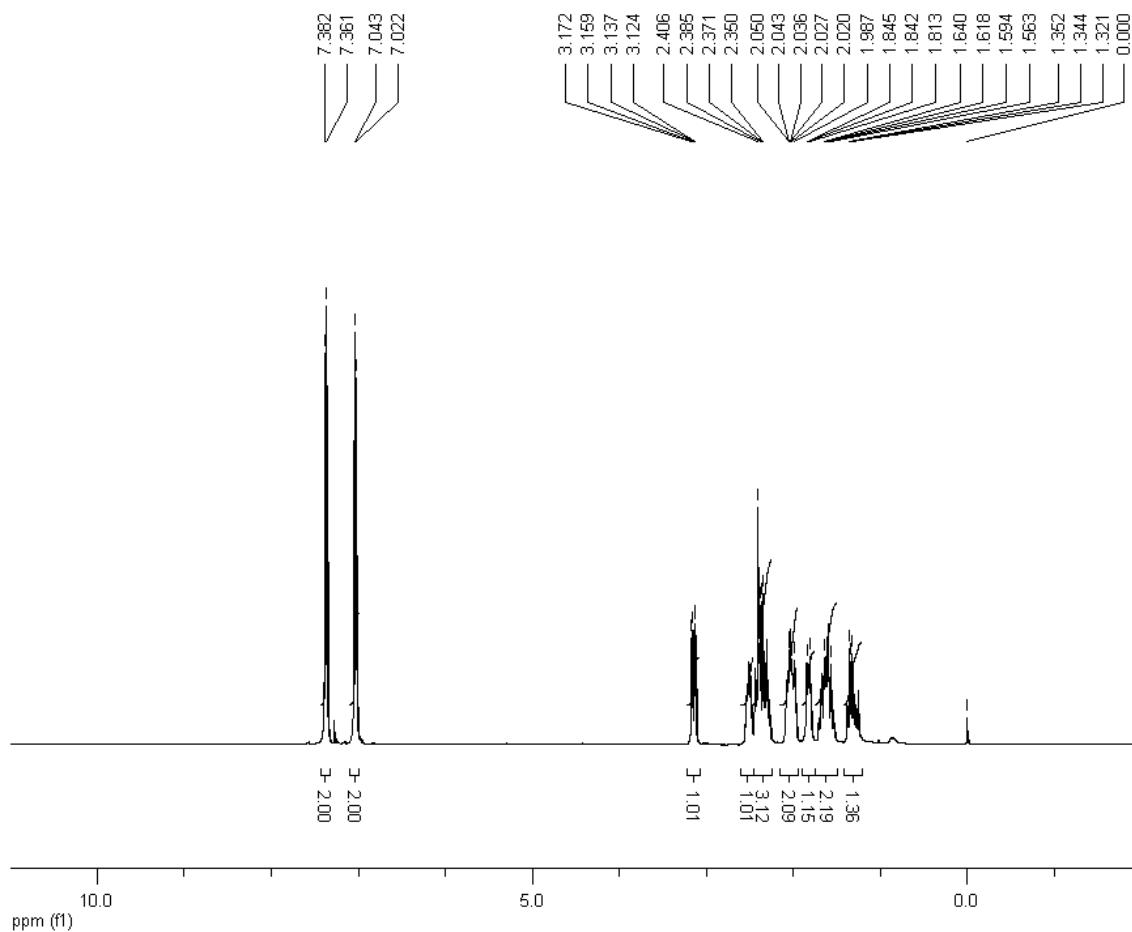

### **ESI-HRMS:**

Calculated: 289.0204 [M+Na<sup>+</sup>], 291.0185 [M+Na<sup>+</sup>+2]

Sample: 289.0206 [M+Na<sup>+</sup>], 291.0186 [M+Na<sup>+</sup>+2]

## 2-(*p*-bromobenzyl)-cyclohexanone

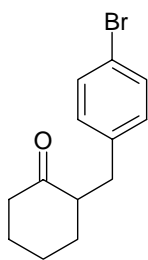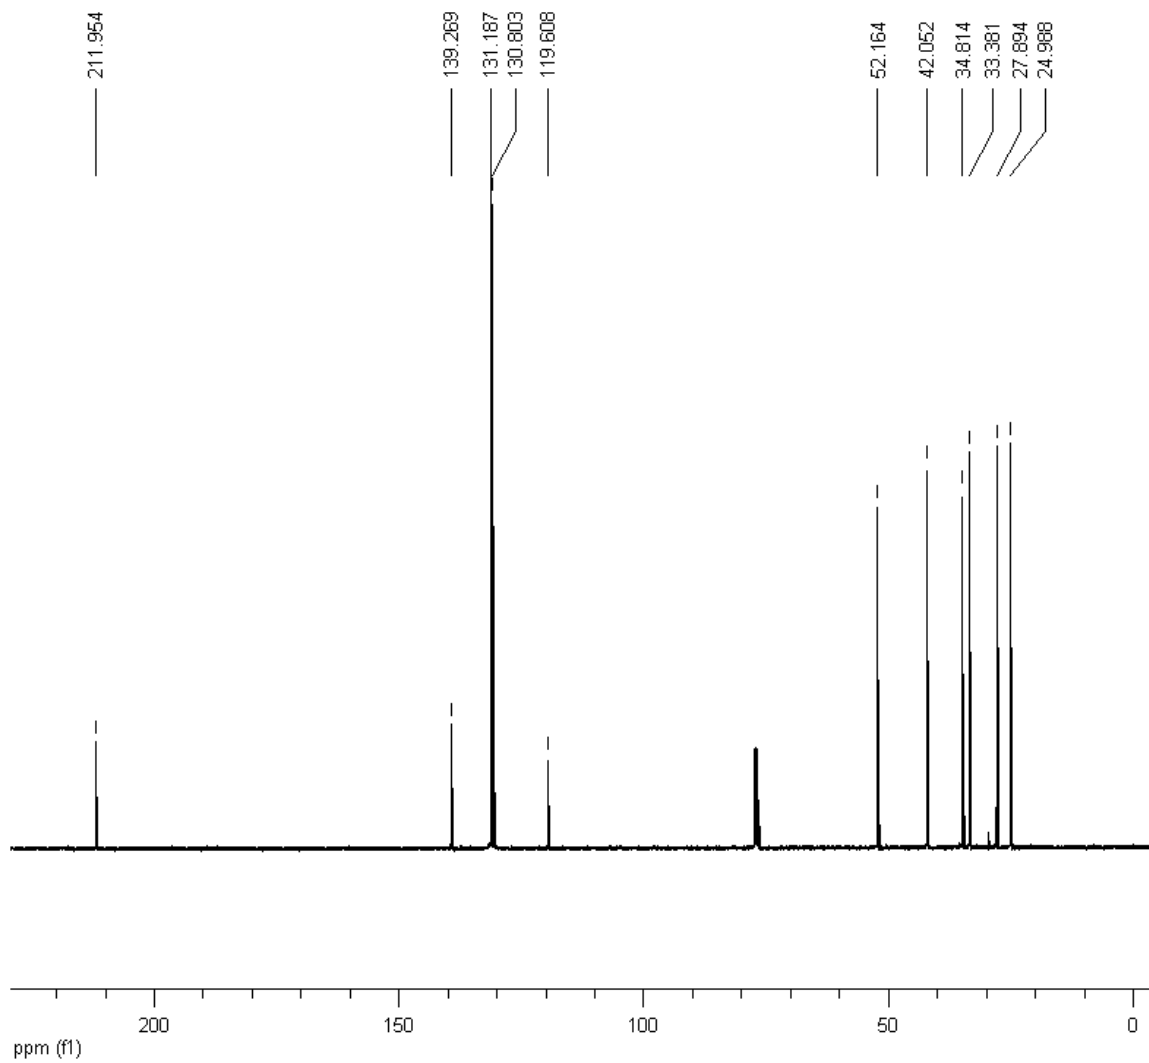

***trans*-2,6-di-(*p*-bromobenzyl)-cyclohexanone**

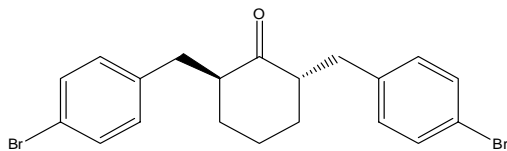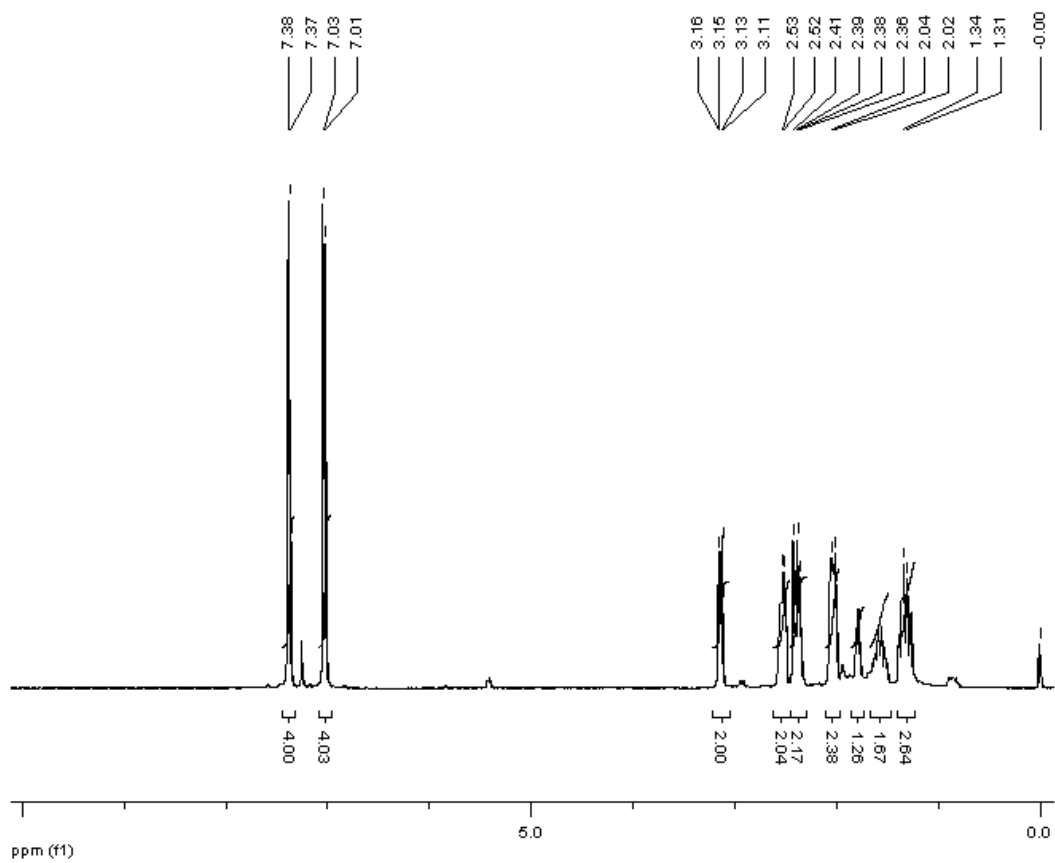

***trans*-2,6-di-(*p*-bromobenzyl)-cyclohexanone**

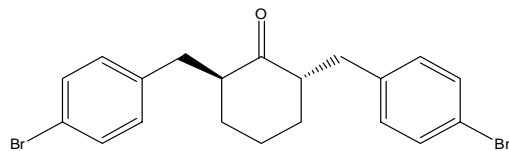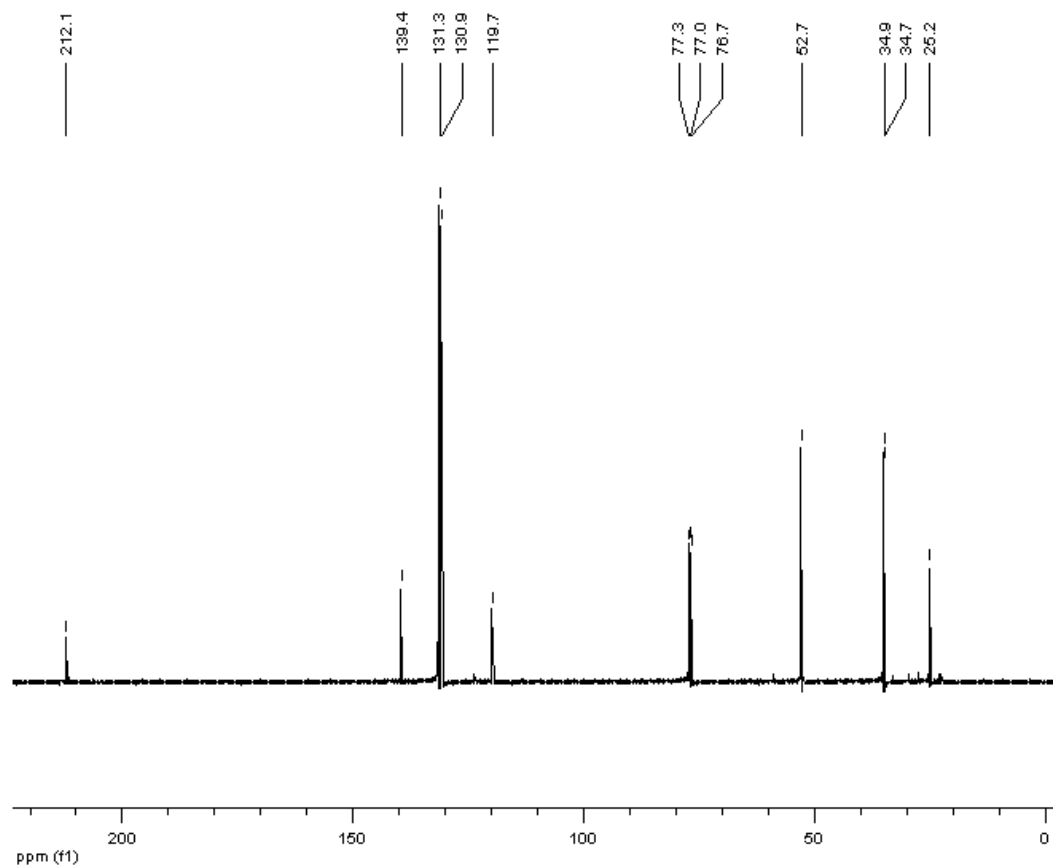

***cis*-2,6-di-(*p*-bromobenzyl)-cyclohexanone**

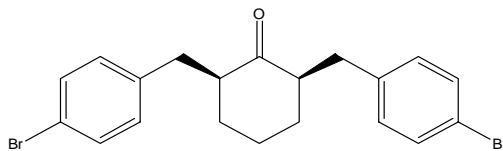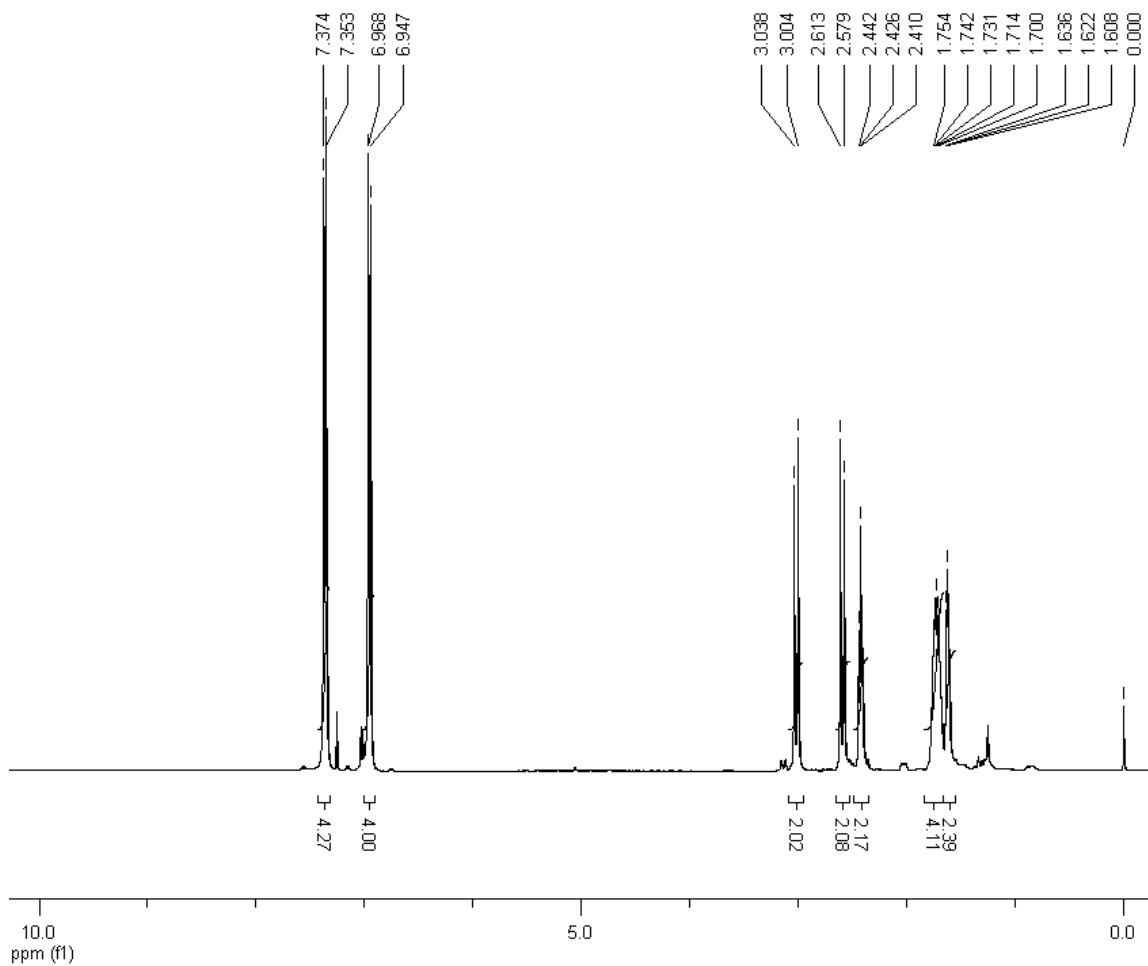

**ESI-HRMS:**

Calculated: 456.9778 [M+Na<sup>+</sup>], 458.9759 [M+Na<sup>+</sup>+2], 460.9742 [M+Na<sup>+</sup>+4]  
Sample: 456.9782 [M+Na<sup>+</sup>], 458.9718 [M+Na<sup>+</sup>+2], 460.9754 [M+Na<sup>+</sup>+4]



***cis*-2,6-di-(*p*-bromobenzyl)-cyclohexanone**

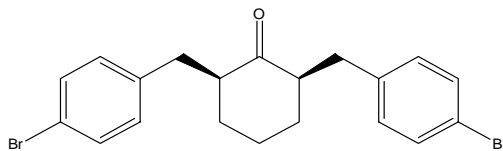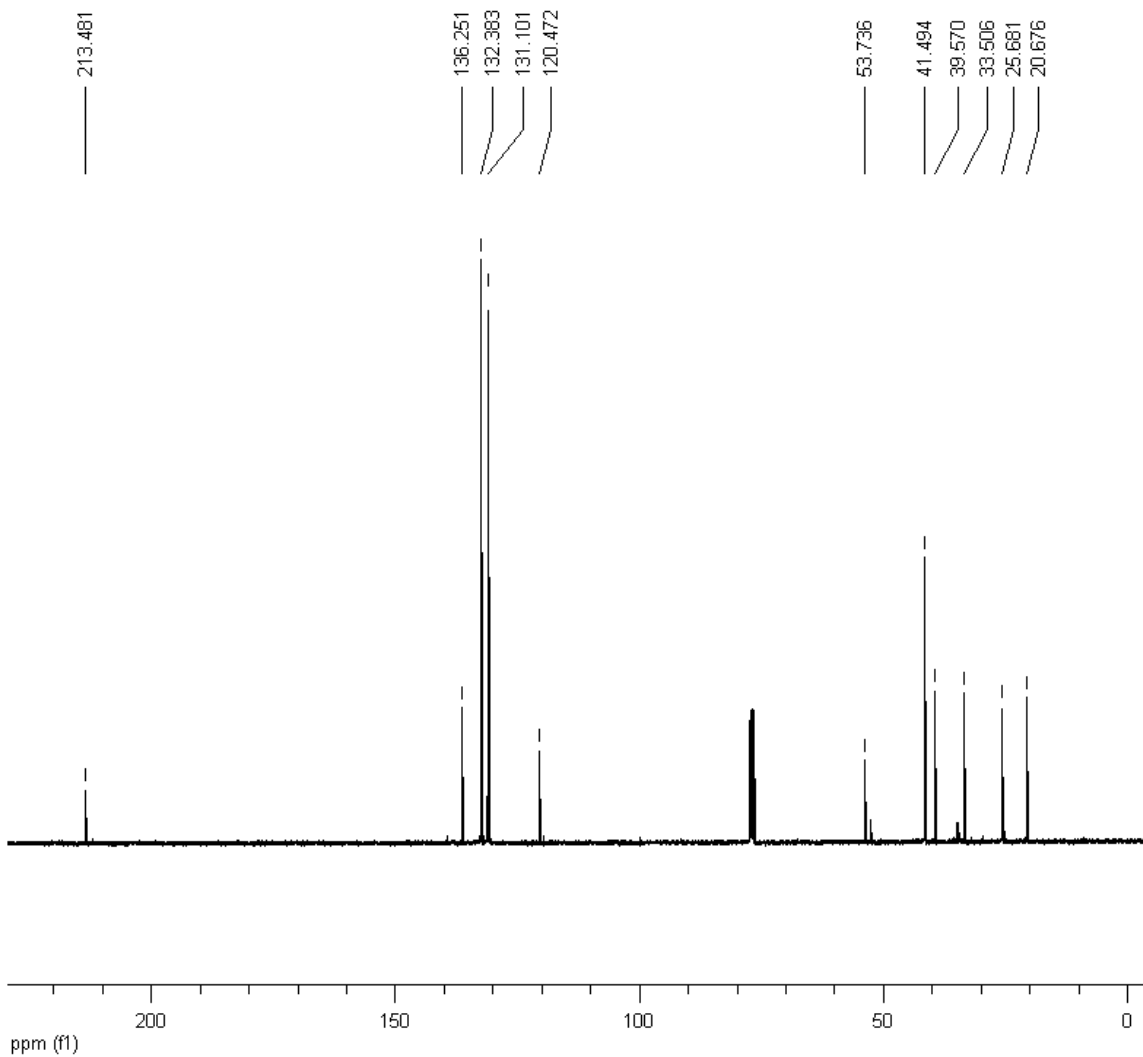

**di-(*p*-bromobenzyl)-ether**

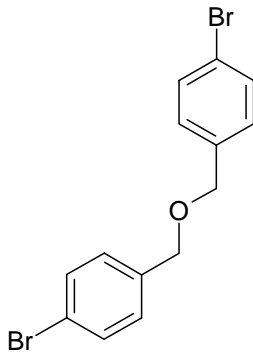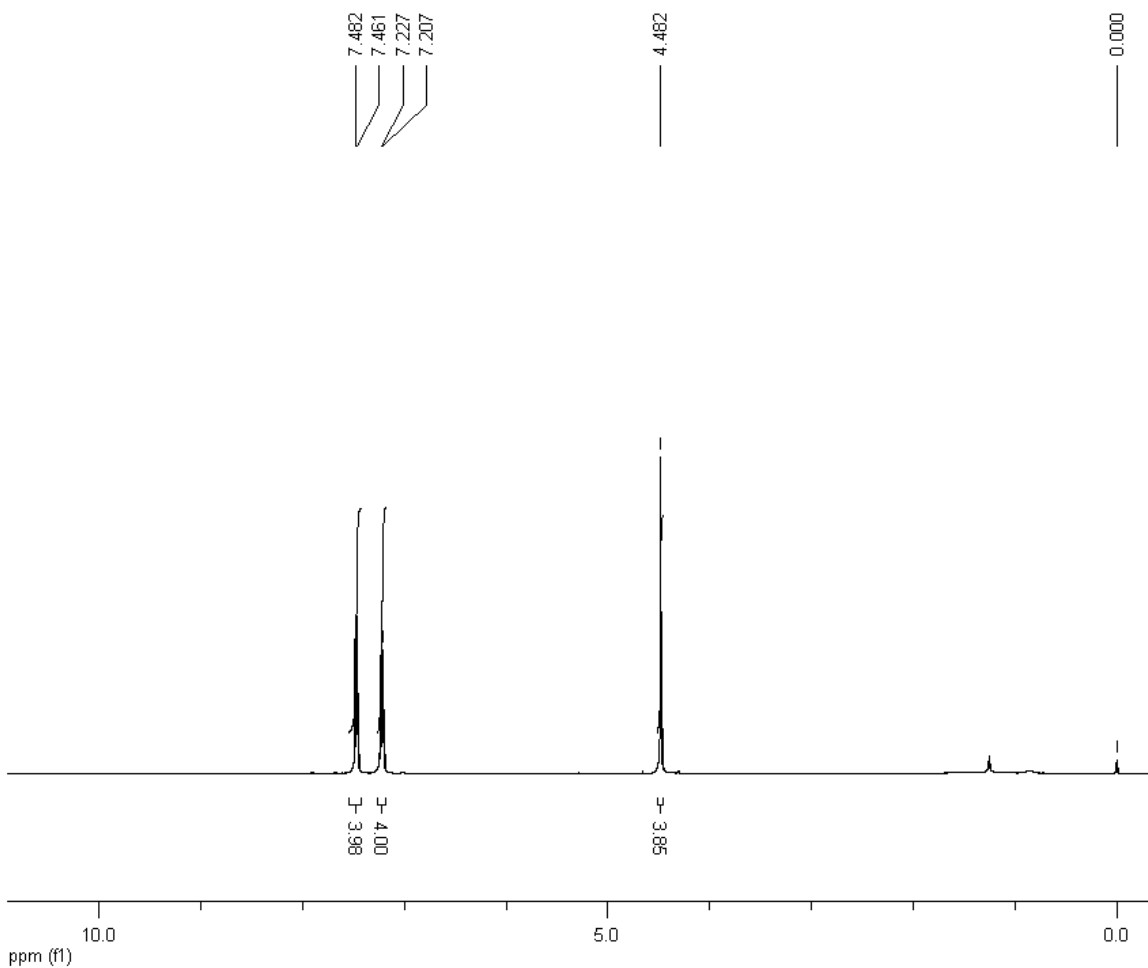

**ESI-HRMS:**

Calculated: 376.9153 [M+Na<sup>+</sup>], 378.9133 [M+Na<sup>+</sup>+2], 380.9114 [M+Na<sup>+</sup>+4]  
Sample: 376.9155 [M+Na<sup>+</sup>], 378.9109 [M+Na<sup>+</sup>+2], 380.9101 [M+Na<sup>+</sup>+4]

**di-(*p*-bromobenzyl)-ether**

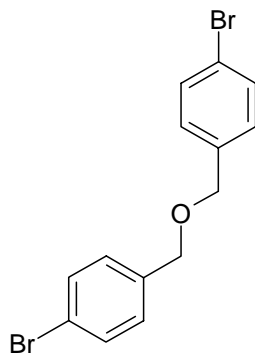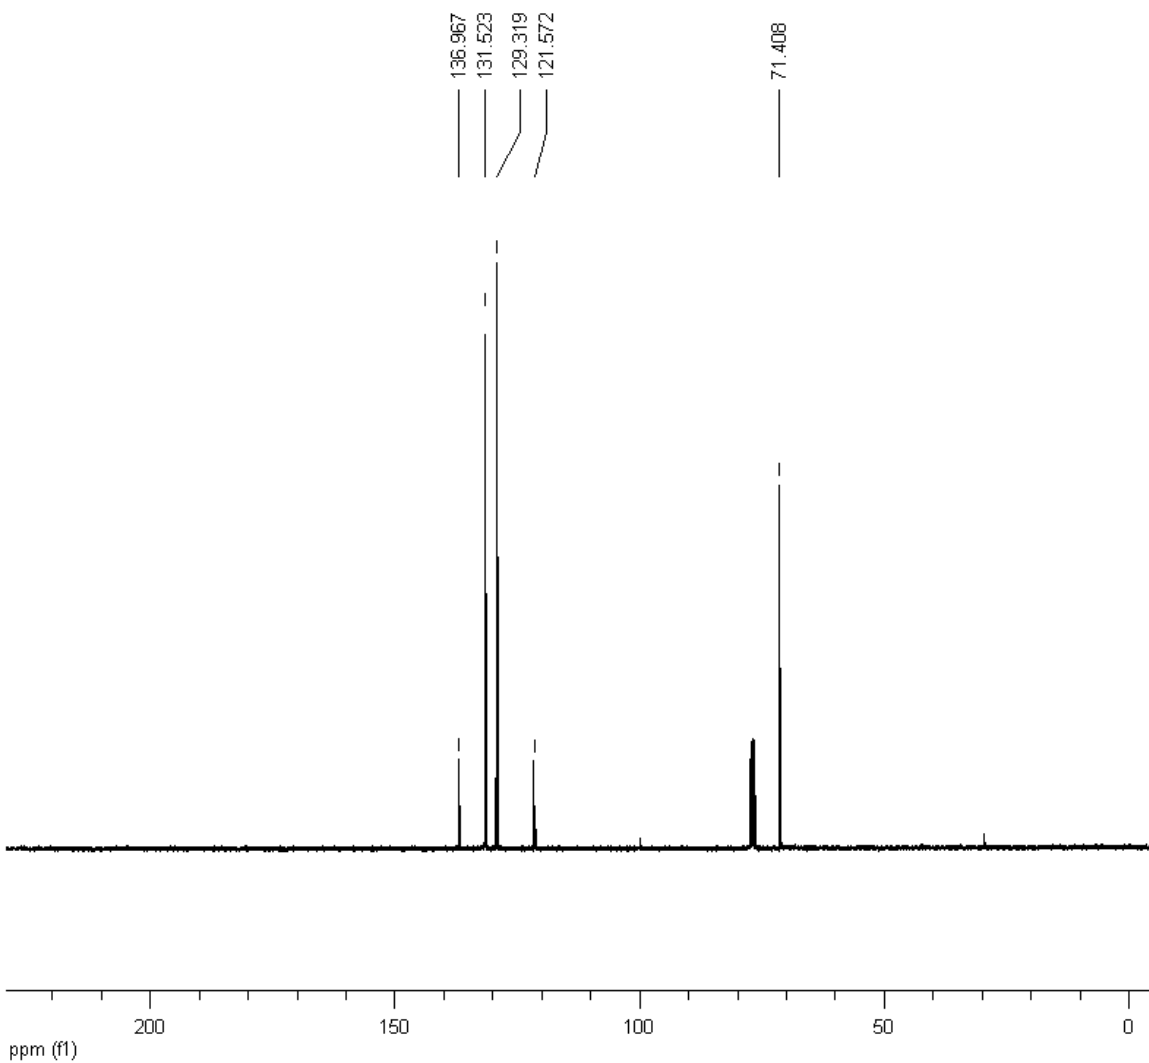

**di-(*p*-bromobenzyl)-carbonate**

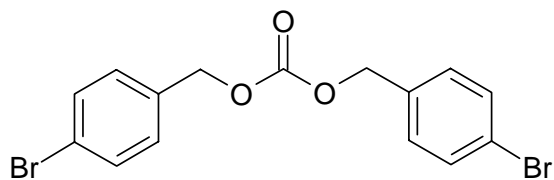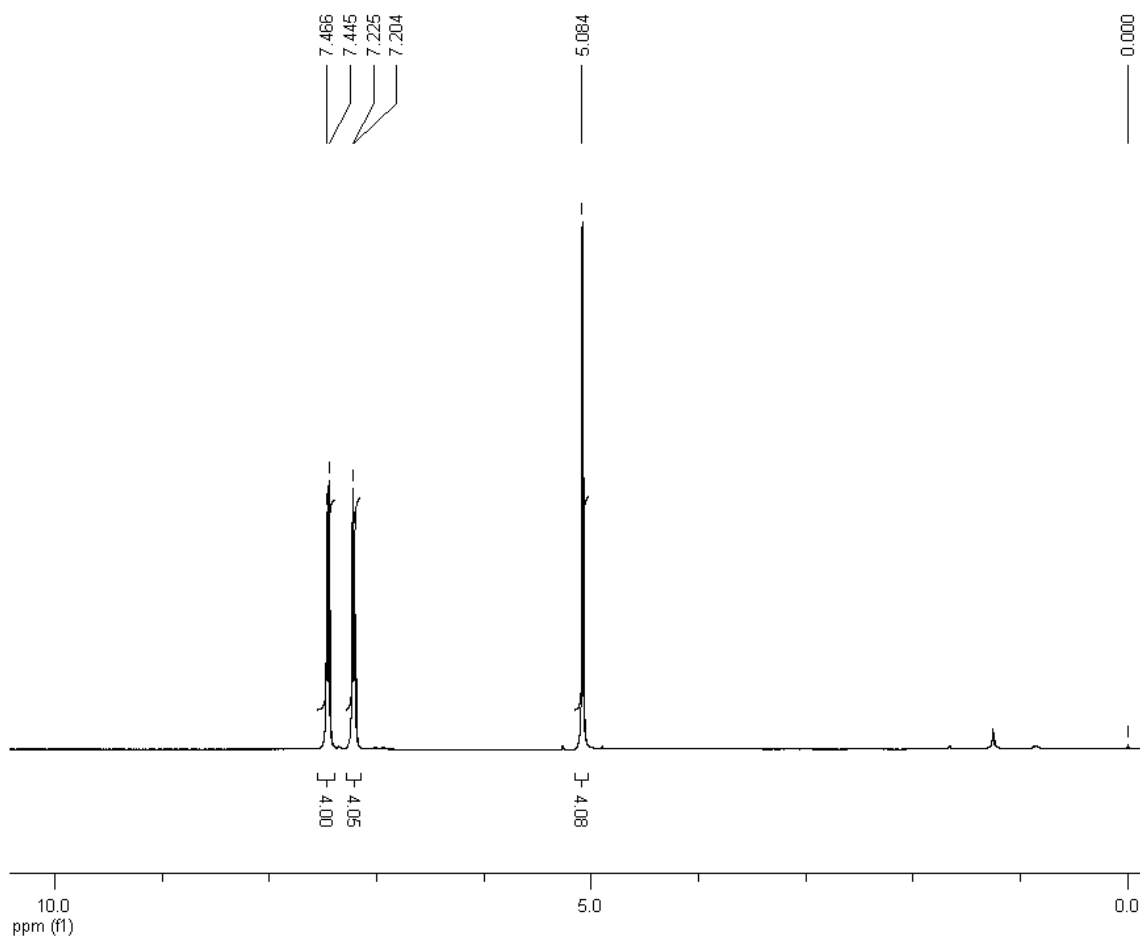

**ESI-HRMS:**

Calculated: 420.9051 [M+Na<sup>+</sup>], 422.9031 [M+Na<sup>+</sup>+2], 424.9013 [M+Na<sup>+</sup>+4]  
Sample: 420.9065 [M+Na<sup>+</sup>], 422.9027 [M+Na<sup>+</sup>+2], 424.9054 [M+Na<sup>+</sup>+4]

**di-(*p*-bromobenzyl)-carbonate**

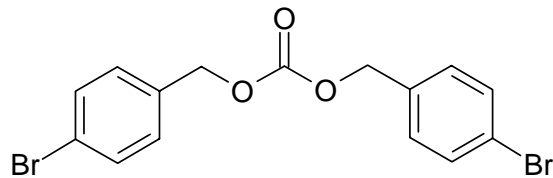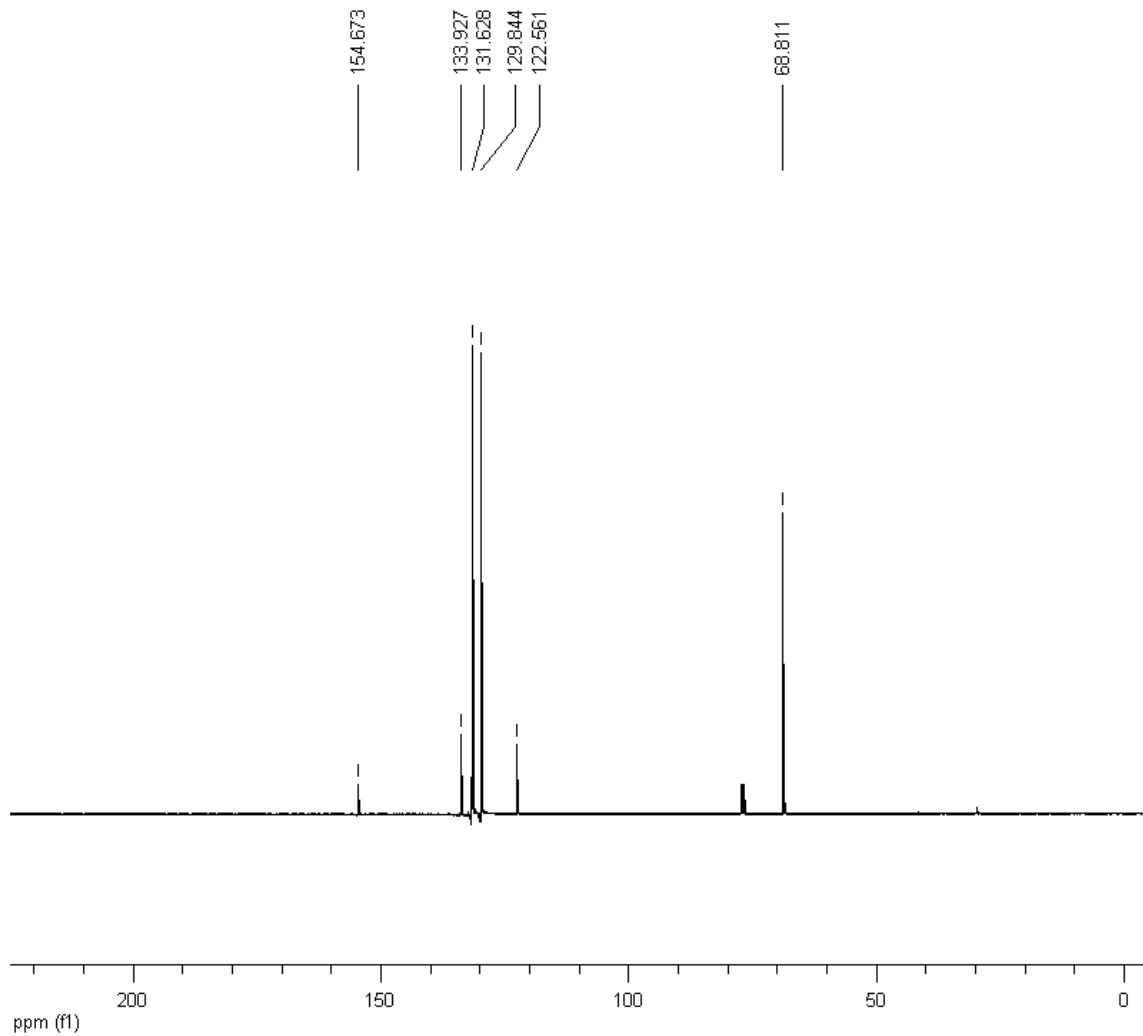

## 2-(*p*-bromobenzyl)-2-methyl-cyclohexanone

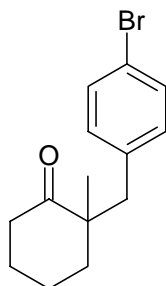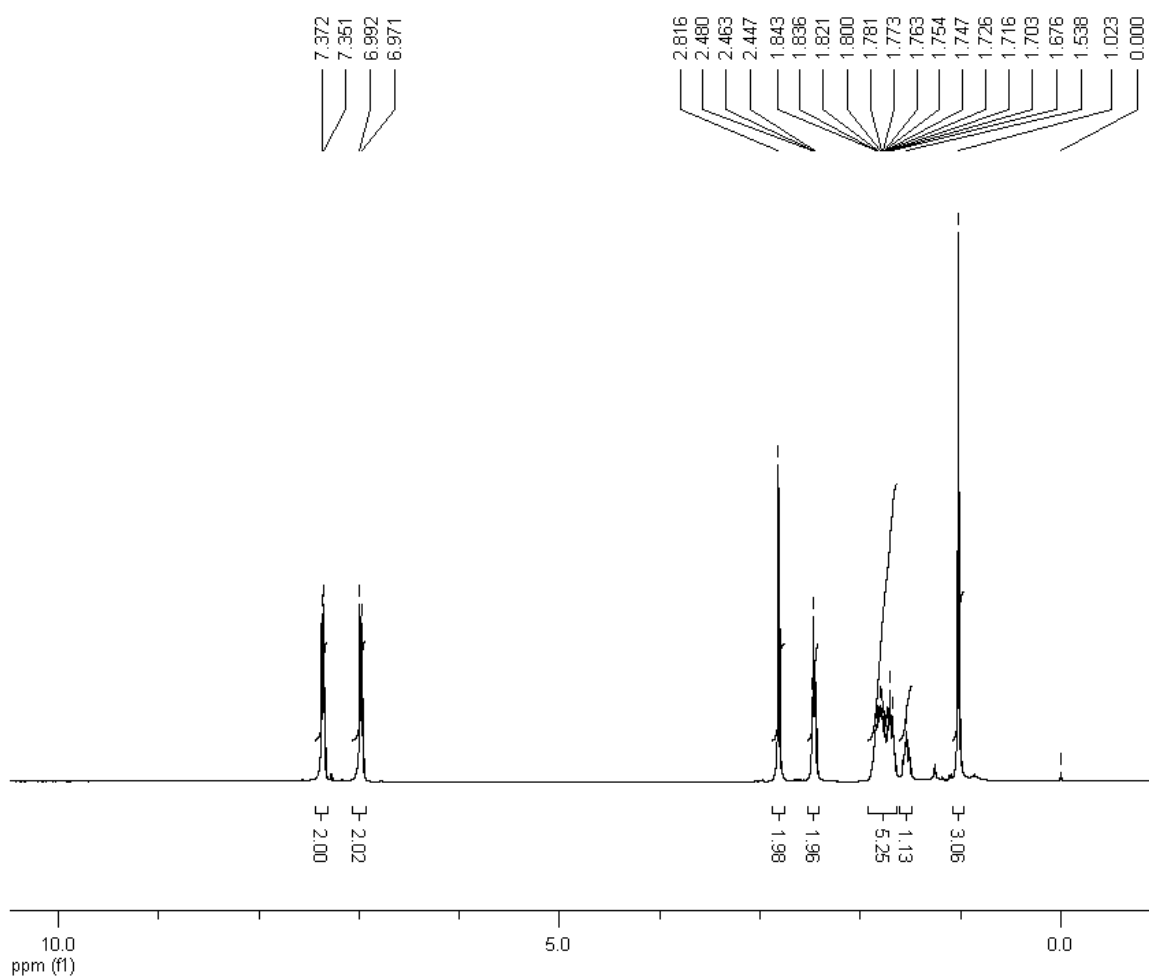

### ESI-HRMS:

Calculated: 303.0360 [M+Na<sup>+</sup>], 305.0341 [M+Na<sup>+</sup>+2]

Sample: 303.0356 [M+Na<sup>+</sup>], 305.0340 [M+Na<sup>+</sup>+2]

### 2-(*p*-bromobenzyl)-2-methyl-cyclohexanone

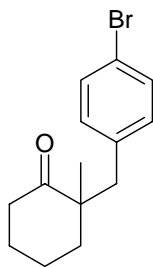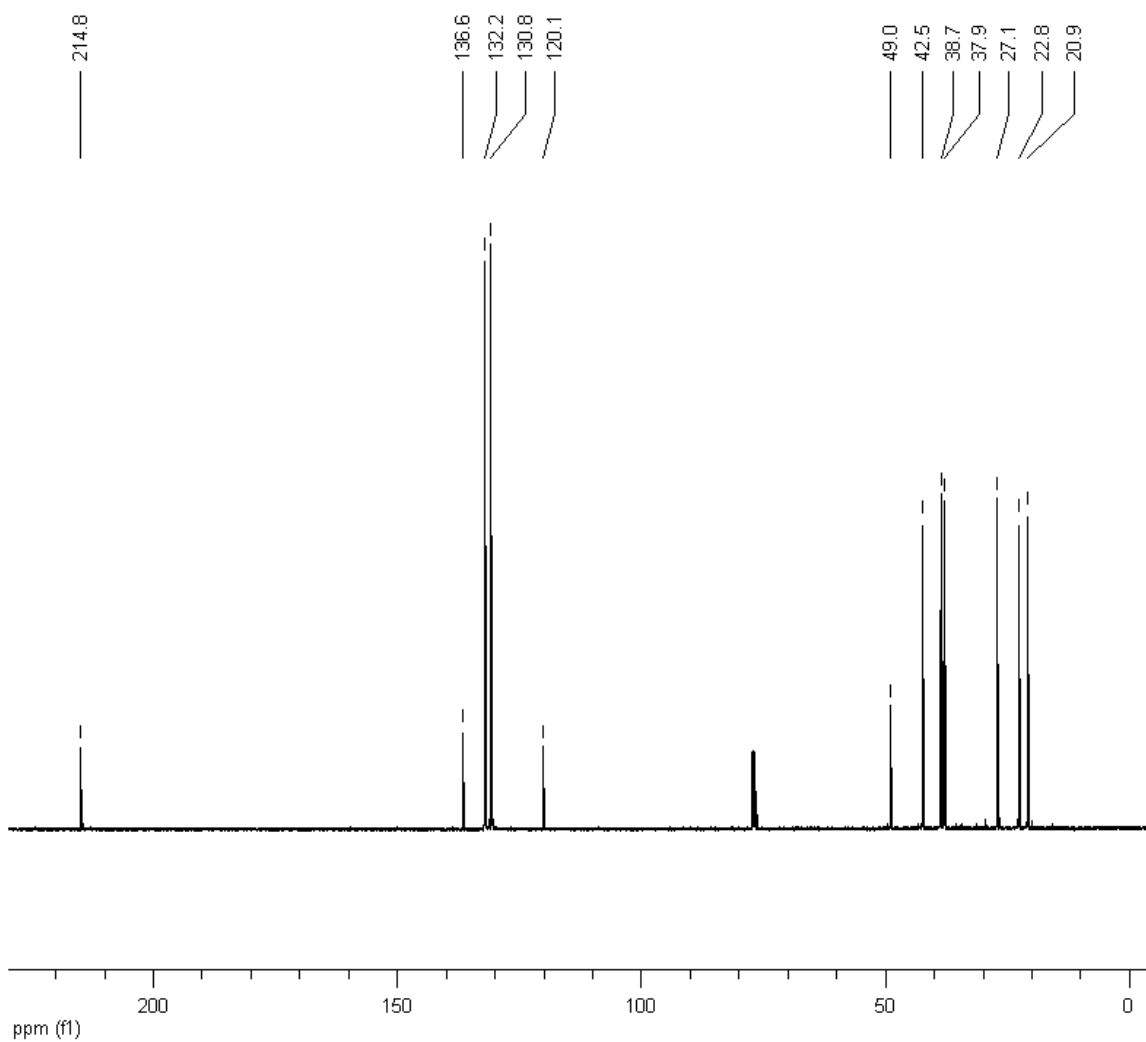

## 2-(*p*-bromobenzyl)-6-methyl-cyclohexanone

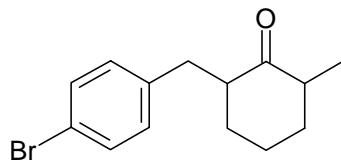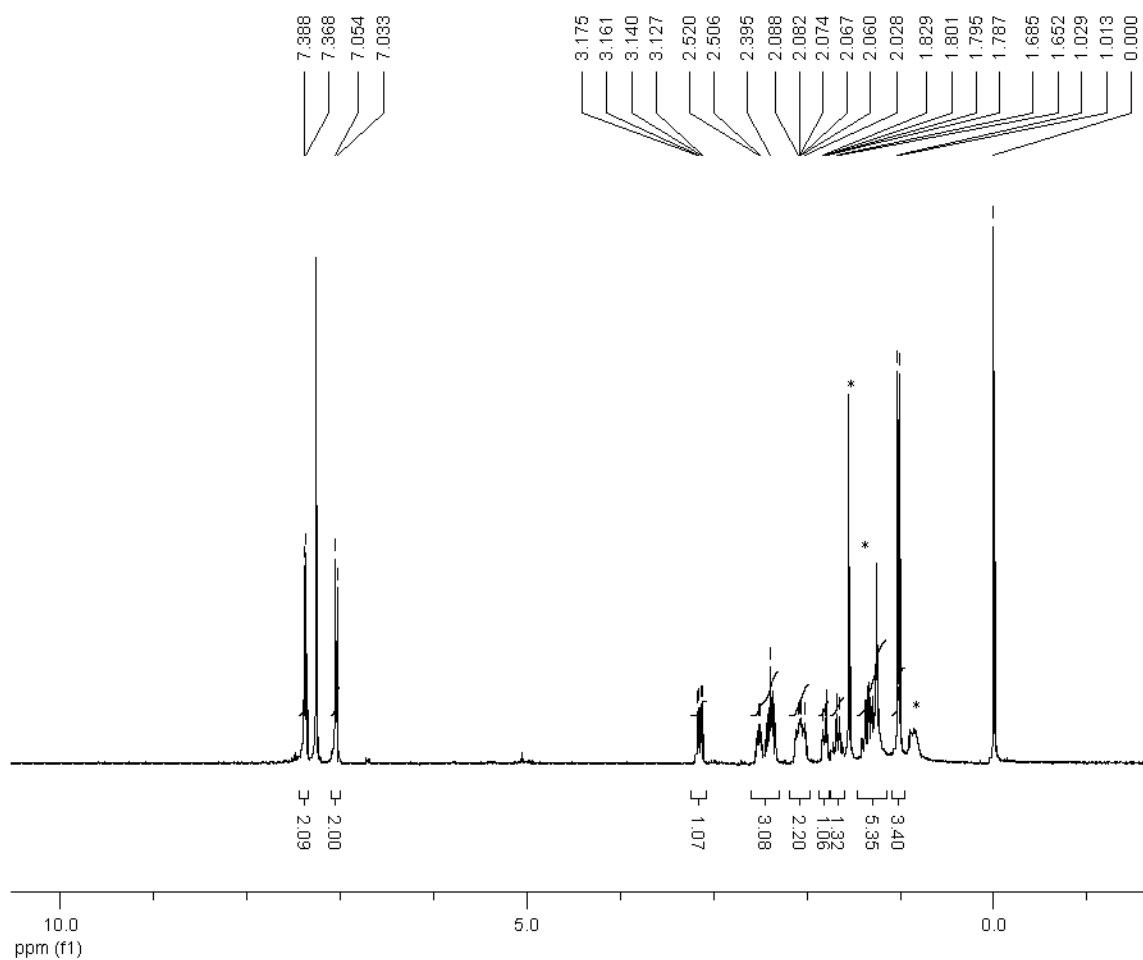

\*Impurity

### ESI-HRMS:

Calculated: 303.0360 [M+Na<sup>+</sup>], 305.0341 [M+Na<sup>+</sup>+2]

Sample: 303.0357 [M+Na<sup>+</sup>], 305.0347 [M+Na<sup>+</sup>+2]



## 2-(*p*-bromobenzyl)-6-methyl-cyclohexanone

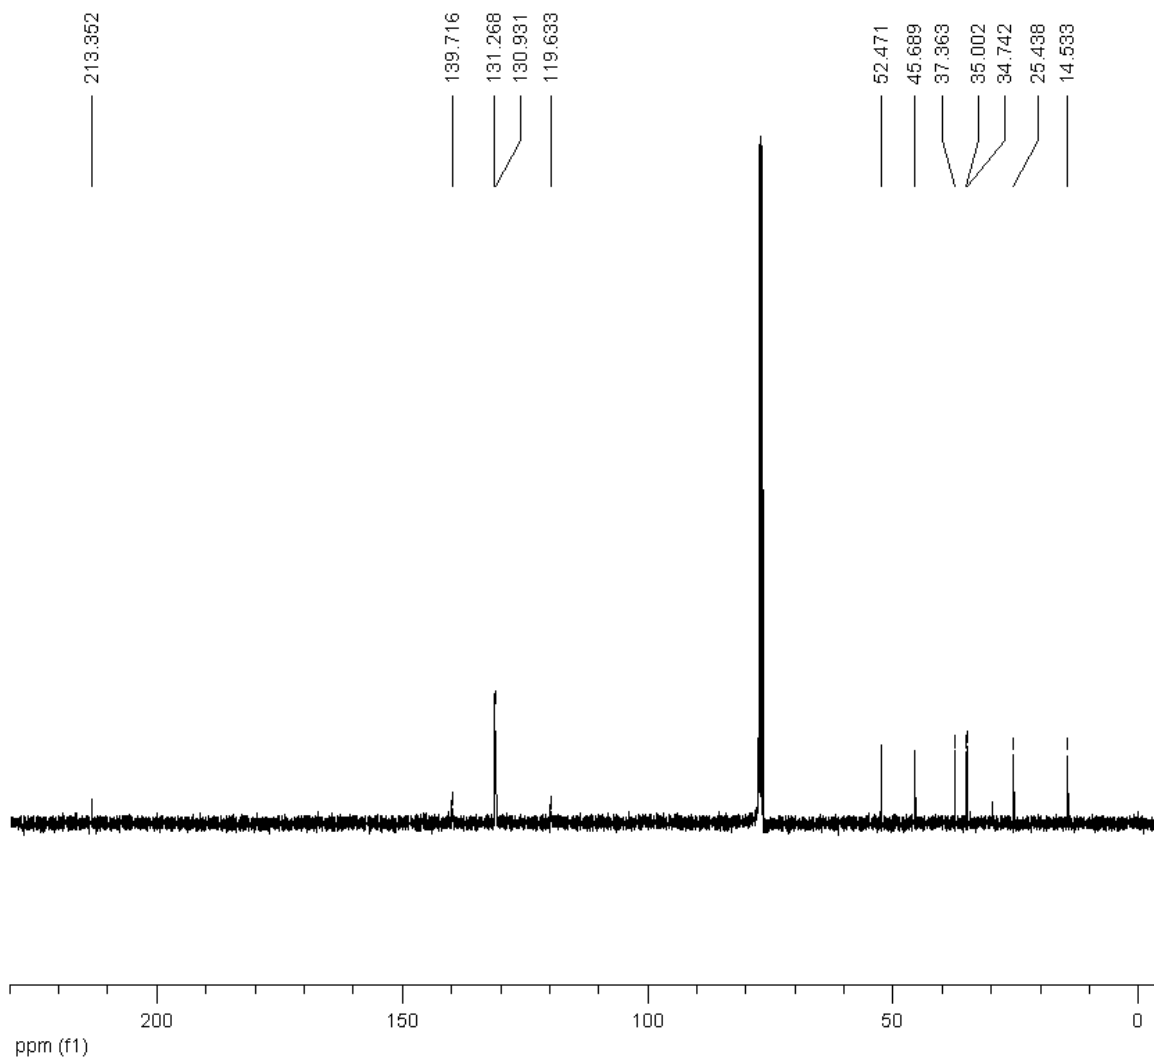

Supplement: b922108p.pdf [file b922108p.pdf]
